# Supplementary material for: Photocatalysis by graphitic carbon nitride modified with 0D, 1D, and 2D carbon-based nanomaterials
Source: Royal Society of Chemistry journal article supplement (doi:10.1039/d2en00206j), 2022-01-01
Supplement: d2en00206j1.pdf [file d2en00206j1.pdf]

## Supporting Information

# Photocatalysis by Graphitic Carbon Nitride Modified with 0D, 1D, and 2D Carbon-Based Nanomaterials

*Bo-Kai Wang<sup>a</sup>, David K Wang<sup>b</sup>, Wen-Che Hou<sup>\*,a</sup>*

*<sup>a</sup>Department of Environmental Engineering, National Cheng Kung University, Tainan City, Taiwan,  
70101*

*<sup>b</sup>School of Chemical and Biomolecular Engineering, The University of Sydney, Darlington, New South  
Wales, Australia*

**Manuscript prepared for publication in:** Environmental Science: Nano

**Pages:** 14

**Figures:** S1-12

**Text:** S1

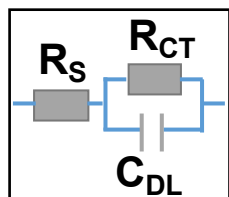

**Figure S1.** The equivalent circuit model, where  $R_s$  is the resistance of electrolyte,  $R_{CT}$  is the electron-transfer resistance, and  $C_{DL}$  is the double layer capacitance.

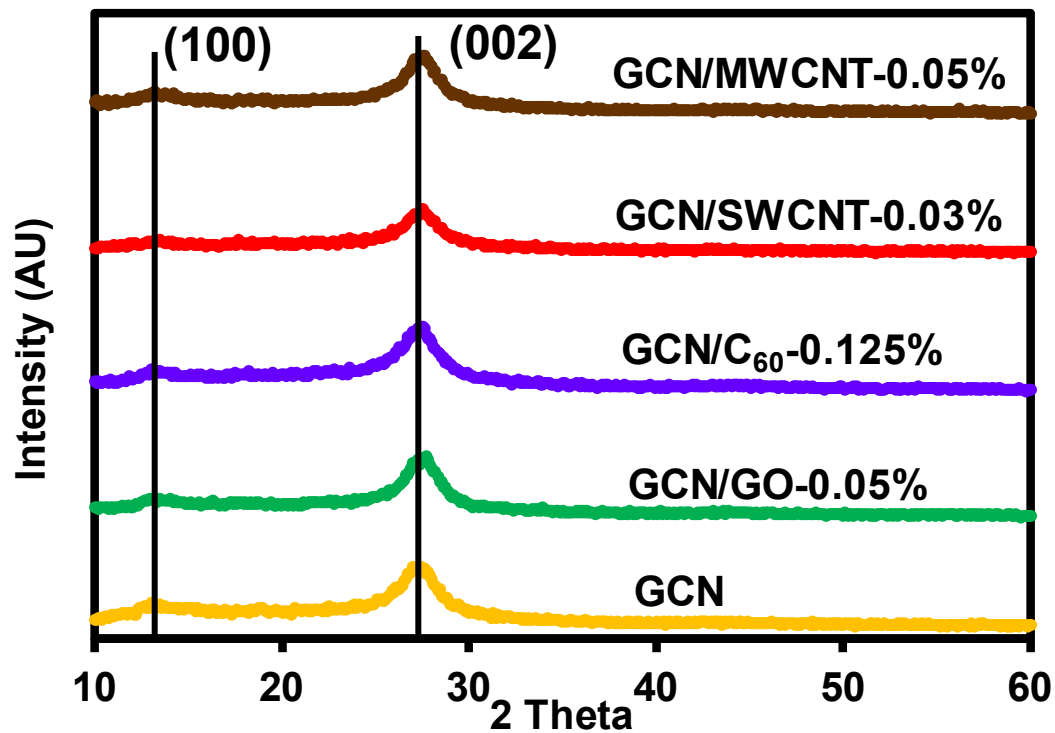

**Figure S2.** XRD patterns of GCN/CBN composite photocatalysts. The data for photocatalysts containing the CBN contents exhibiting superior photoreactivity in each series of GCN/CBN samples are presented.

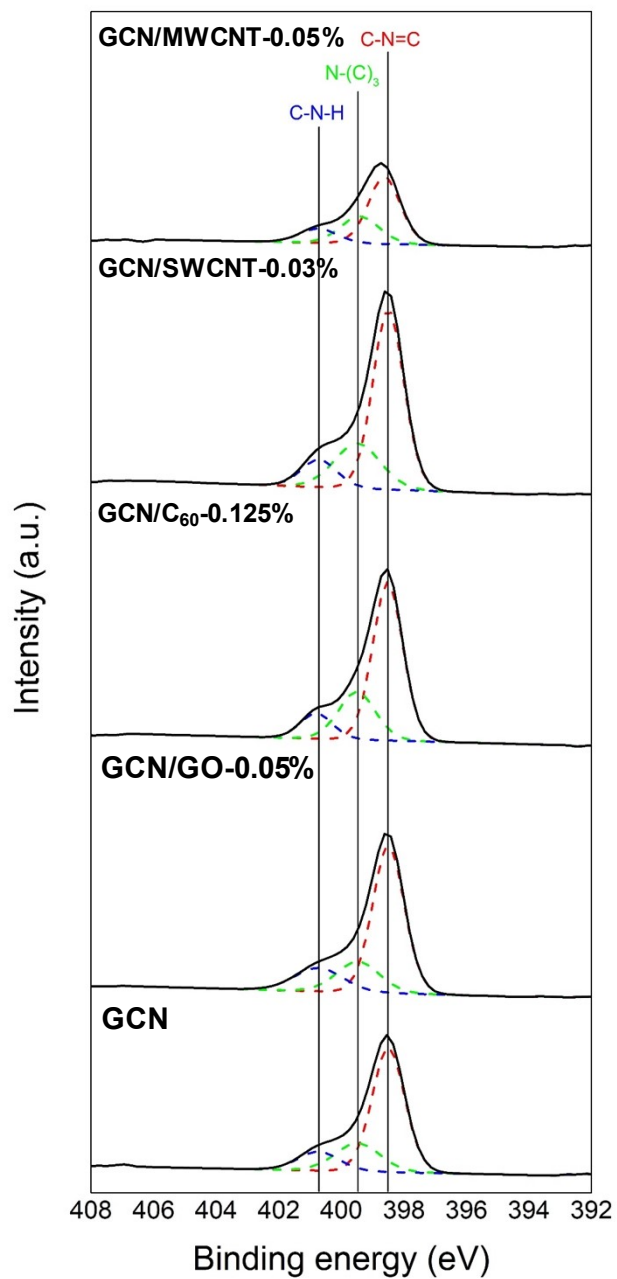

**Figure S3.** XP spectra of GCN and GCN/CBN composite photocatalysts.

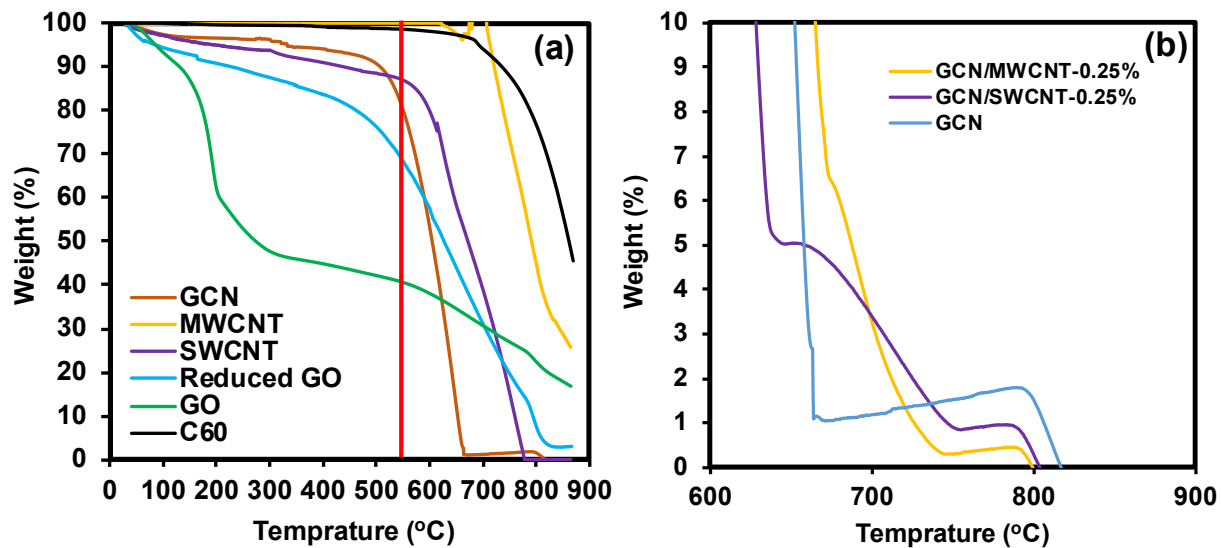

**Figure S4.** Thermogravimetric analysis of CBNs, pure GCN, and GCN/CBNs.

**Text S1.** Additional TGA discussion.

GO showed about 55% of weight loss during heating to 550°C, and that can be attributed to the removal of oxygen-containing functionalities<sup>1</sup>. As a reference, reduced GO (rGO) whose oxygen-containing functionalities have been removed exhibited 30% weight loss.

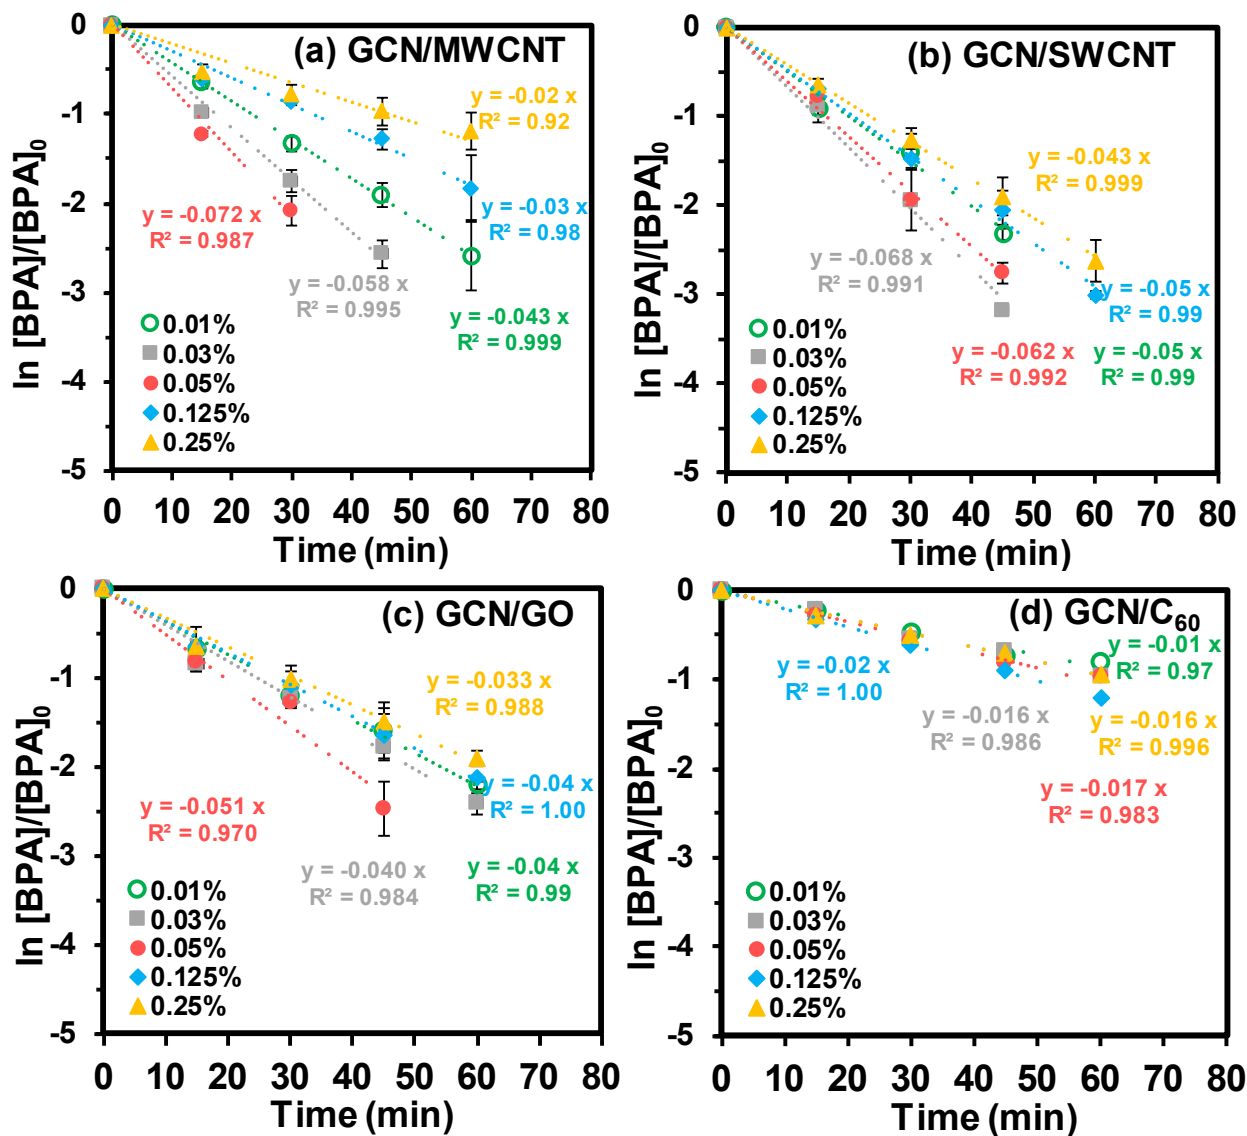

**Figure S5.** Data fitting to the 1<sup>st</sup>-order kinetics, showing the photocatalysis of BPA by GCN embedded with (a) MWCNT, (b) SWCNT, (c) GO, and (d) C<sub>60</sub>. Condition: [catalyst] = 1 g/L, [BPA] = 5 mg/L, pH = 7.0.

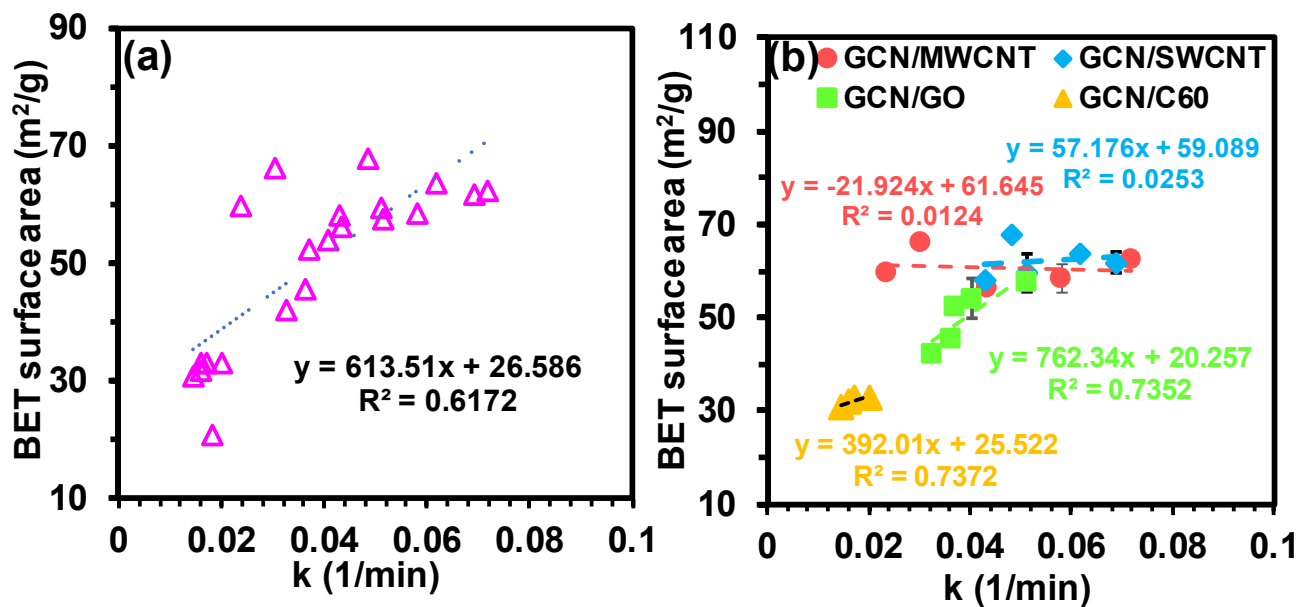

**Figure S6.** The correlation of surface areas and 1<sup>st</sup>-order rate coefficients of all GCN/CBNs at various loadings, showing (a) the overall correlation, and (b) the correlation of specific GCN/CBN.

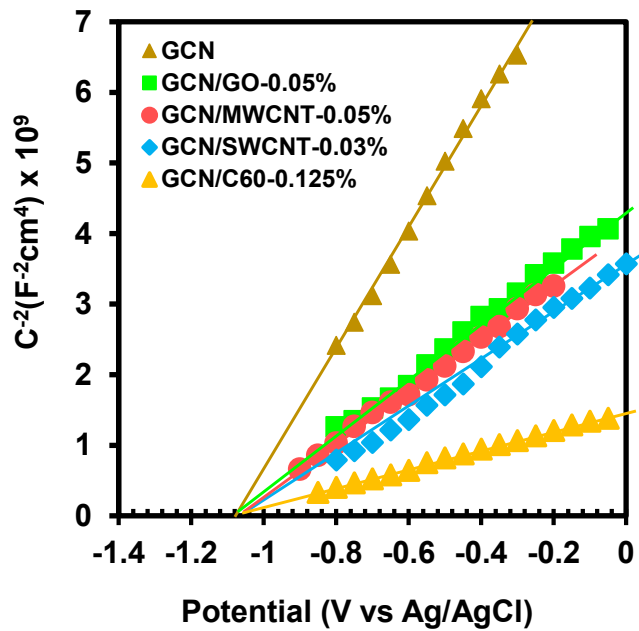

**Figure S7.** The Mott-Schottky plot. The samples represent the ones that had the greatest photoreactivity in each series of GCN/CBNs with varied loadings.



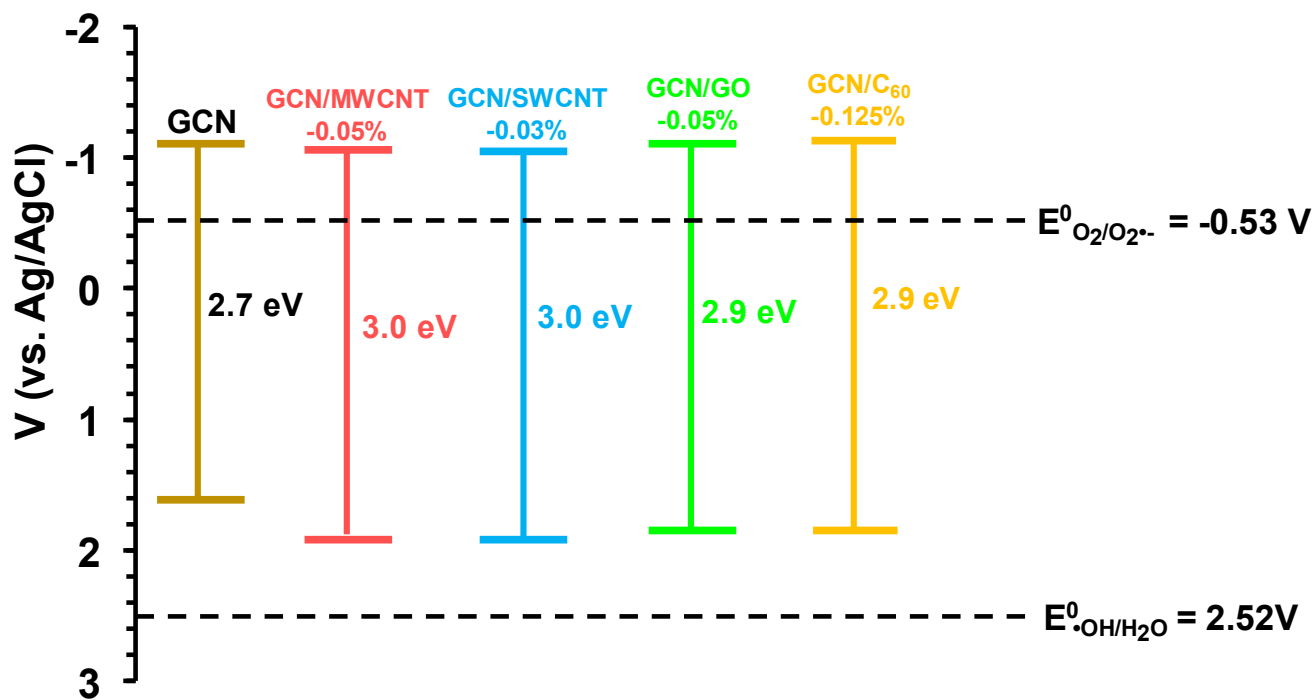

**Figure S8.** Schematic showing the electrochemical potentials of conduction band and valence band of GCN/CBNs.

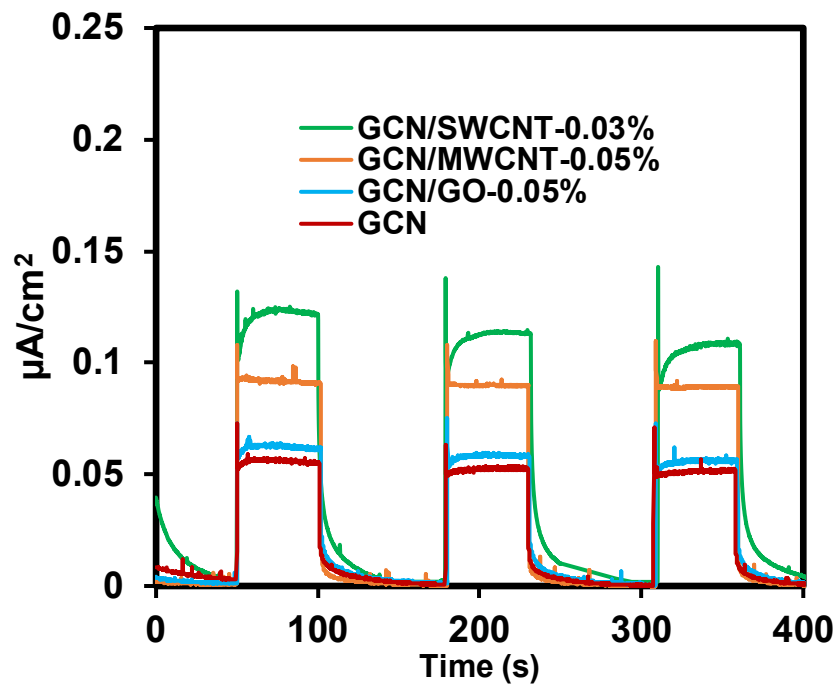

Figure S9. Photocurrent analysis of pure GCN, and GCN/CBN composites.

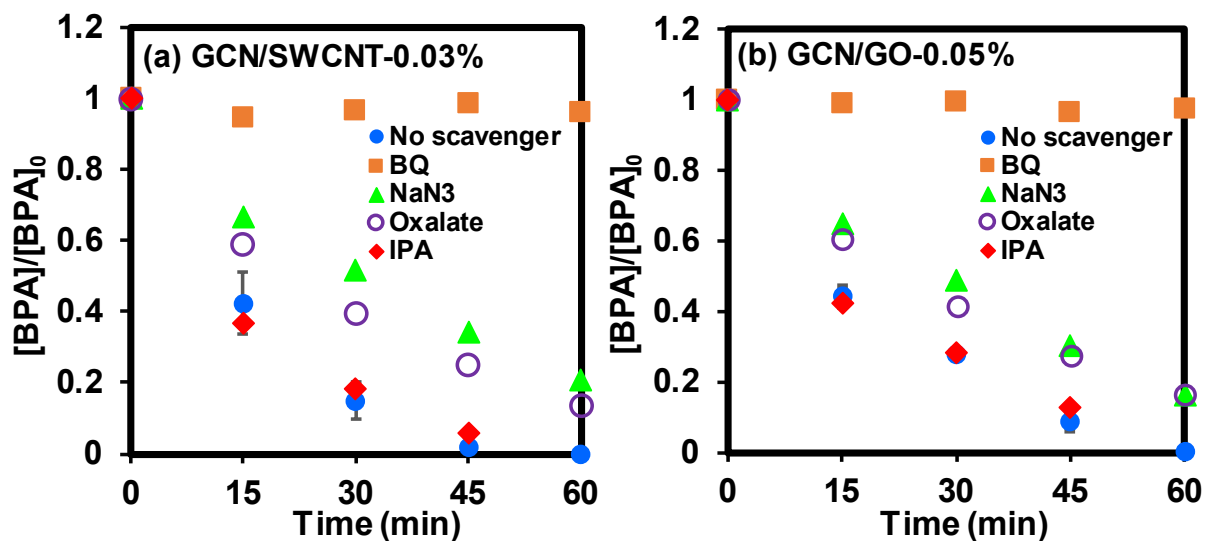

Figure S10. Photocatalysis of BPA by GCN/CBN photocatalysts in the presence of different quenchers.

Condition : [catalyst] = 1 g/L, [BPA] = 5 mg/L, [quenchers] = 1 mM, pH = 7.0.

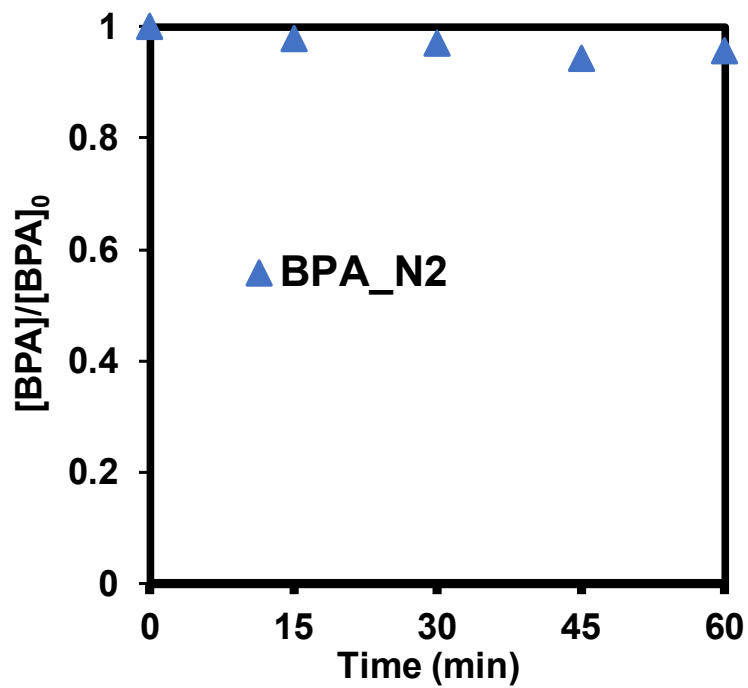

**Figure S11.** Photocatalysis of BPA by GCN/MWCNT-0.05% in  $N_2$ -purged reaction solution.

Condition: [catalyst] = 1 g/L, [BPA] = 5 mg/L, pH = 7.0.

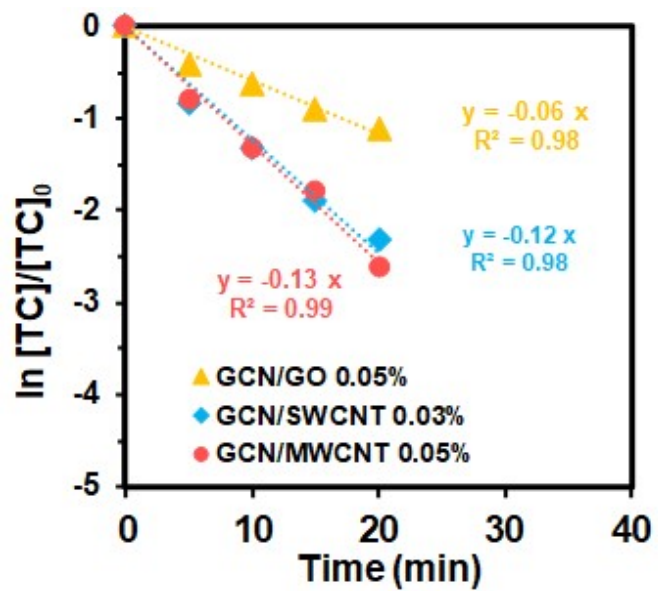

**Figure S12.** Data fitting to the 1<sup>st</sup>-order kinetics, showing the photocatalysis of tetracycline (TC) by various GCN/CBNs. Condition: [Catalyst] = 1 g/L, [TC] = 50 mg/L, pH = 7.0.

## Reference

1 F. Farivar, P. L. Yap, K. Hassan, T. T. Tung, D. N. H. Tran, A. J. Pollard and D. Lotic, *Carbon*, 2021, **179**, 505–513.
